# Supplementary material for: Arachidonic acid-regulated calcium signaling in T cells from patients with rheumatoid arthritis promotes synovial inflammation
Source: PubMed Central journal article supplement (PMC7875984; doi:10.1038/s41467-021-21242-z), 2021-02-10
Supplement: 41467_2021_21242_MOESM1_ESM.pdf [file 41467_2021_21242_MOESM1_ESM.pdf]

## Supplementary information

### Arachidonic acid-regulated calcium signaling in T cells from patients with rheumatoid arthritis promotes synovial inflammation

Zhongde Ye, Yi Shen, Ke Jin, Jingtao Qiu, Bin Hu, Rohit R. Jadhav, Khushboo Sheth, Cornelia M. Weyand, Jörg J. Goronzy

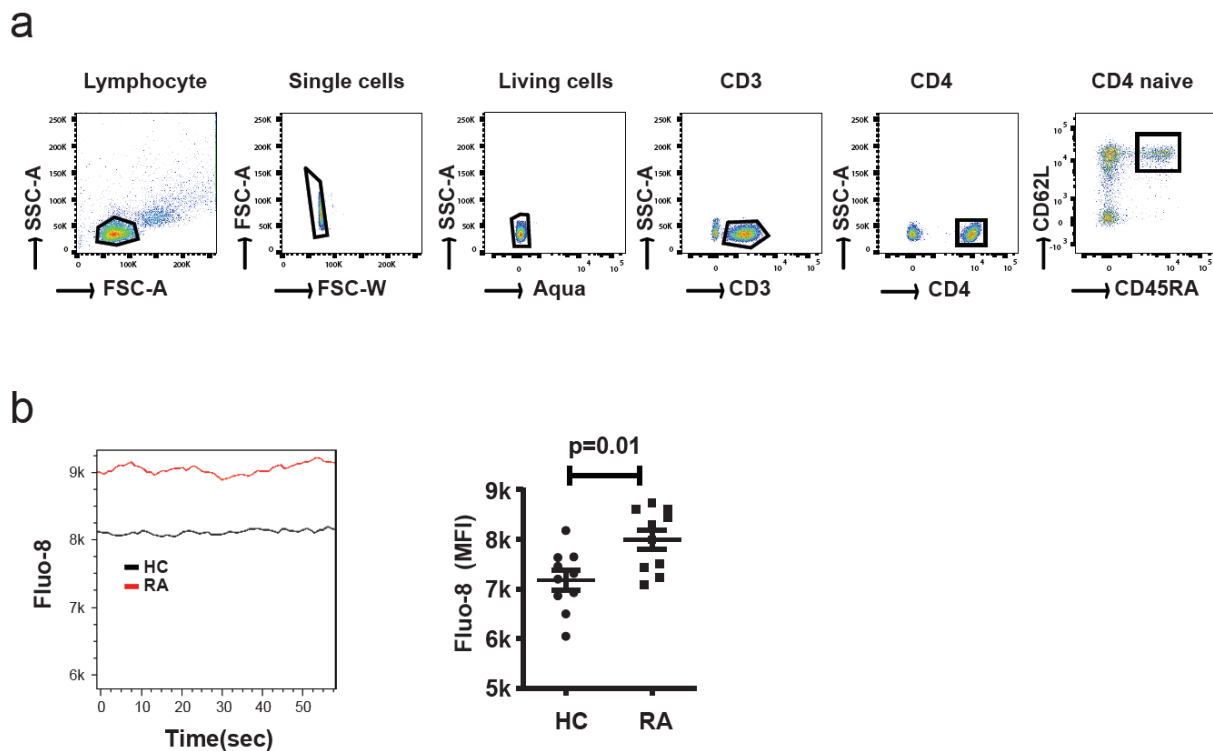

**Supplementary Figure 1. Flow cytometric studies of RA T cells.** (a) Gating strategies for flow cytometric studies of naïve CD4 T cells from PBMC for pSLP76 and pERK expression corresponding to Fig. 1a, b, d. (b) In initial calcium tracing studies, PBMC cells were labeled with 2  $\mu$ M Fluo-8 instead of FuraRed. One representative tracing (left) and Fluo-8 fluorescence of naïve CD3<sup>+</sup>CD4<sup>+</sup>CD45RA<sup>+</sup>CD62L<sup>+</sup> T cells from 9 HC and 10 RA patients (right). Data were analyzed by unpaired two-tailed student's *t* test and presented as mean  $\pm$  SEM. Gating strategy as in Supplementary Figure 1a. Source data are provided as a Source Data file.

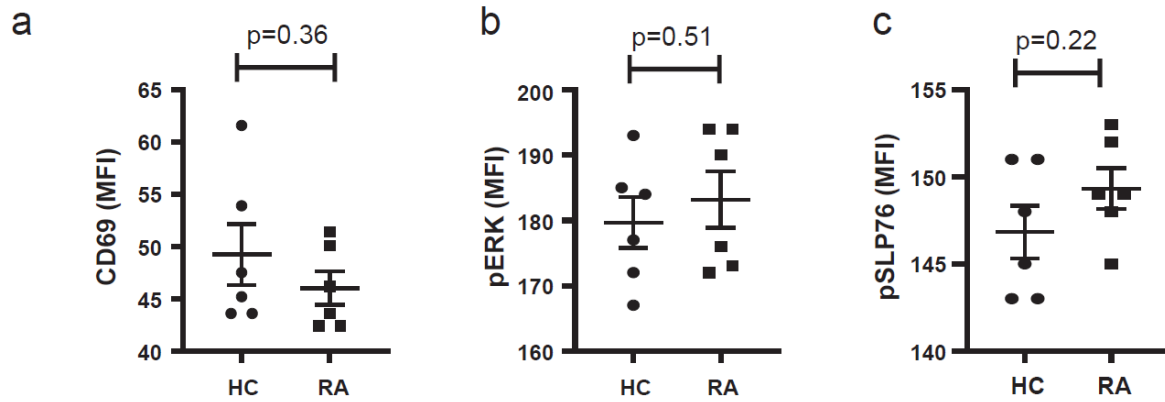

**Supplementary Figure 2. Failure to induce activation markers by culture in RA serum.** CD4 naïve T cells were cultured with serum from HC (n=6) or RA (n=6) patients for 24 hours. No significant difference in CD69 expression (a) , ERK (b) or SLP76 phosphorylation (c) was observed. Data were analyzed by unpaired two-tailed student's *t* test and presented as mean± SEM (a,b,c). Source data are provided as a Source Data file.

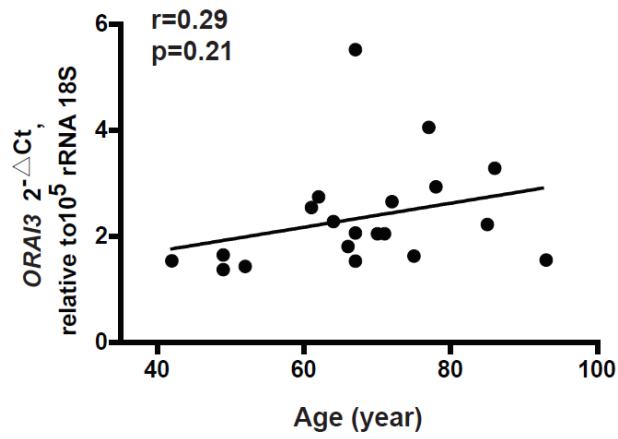

**Supplementary Figure 3. Relationship between age and ORAI3 transcript expression in RA patient.** Data was analyzed by using two-tailed Pearson's correlation. Source data are provided as a Source Data file.

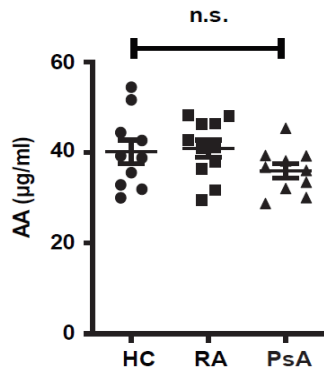

**Supplementary Figure 4. Serum concentrations of arachidonic acid.** Results are from HC (n=10), RA (n=11) and PsA (n=10) patients. Data were analyzed by unpaired two-tailed student's *t* test and presented as mean  $\pm$  SEM. Source data are provided as a Source Data file.

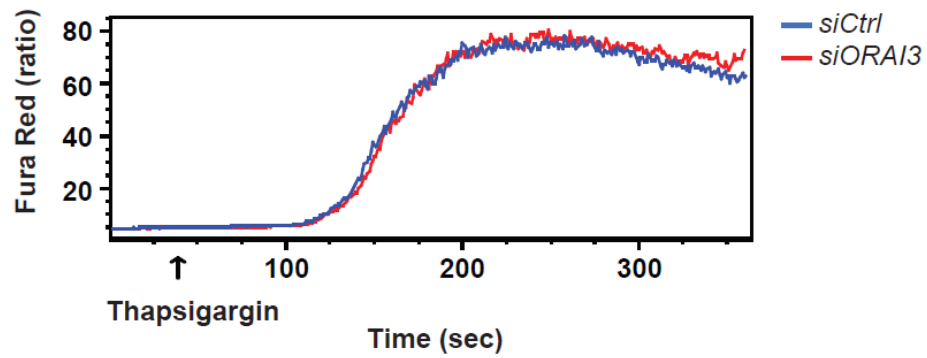

**Supplementary Figure 5. Thapsigargin-induced SOCE-dependent calcium flux after *ORAI3* silencing.** CD4 naïve T cells were transfected with *ORAI3* or control siRNA. Cells were loaded with Fura-Red. Thapsigargin (2 $\mu$ M)-induced SOCE-dependent calcium influx was monitored.

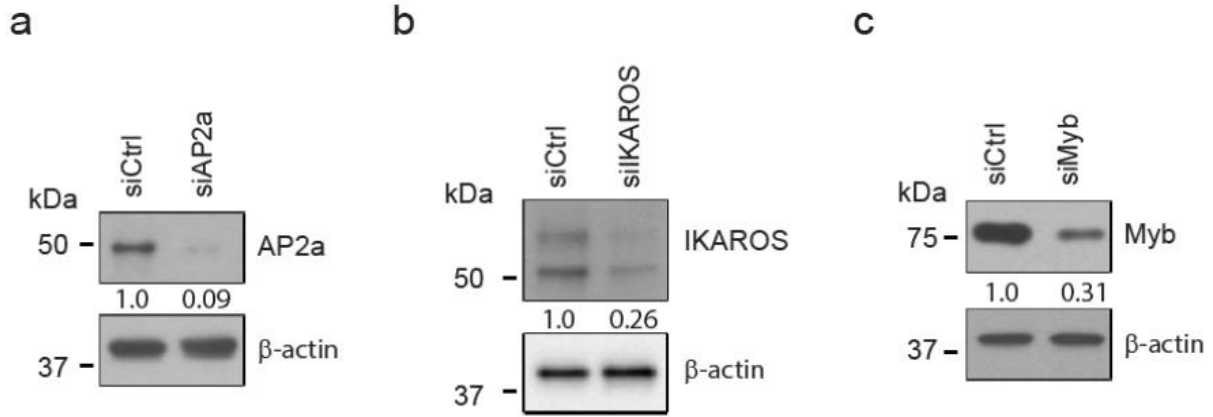

**Supplementary Figure 6. Knockdown efficiency of AP-2a, IKAROS and Myb.** Western blots corresponding to the experiments in Fig.7b are shown. Two times experiment were repeated independently with similar results. Corresponding uncropped Western blots in Supplementary Figure 10.

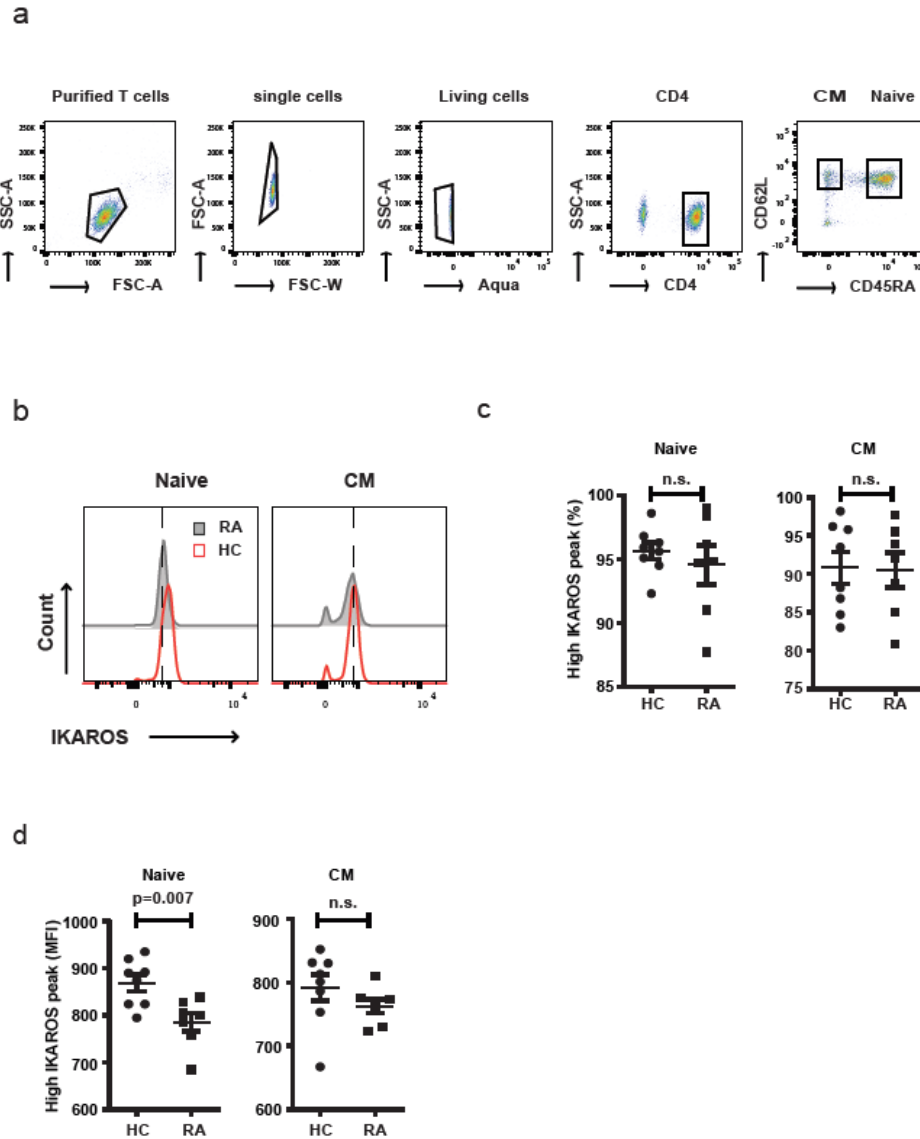

**Supplementary Figure 7. Flow cytometric studies of IKAROS expression in naïve and CM CD4 T cells.** (a) Gating strategies for flow cytometric studies of naïve and CM CD4 T cells from purified T cells to determine IKAROS expression corresponding to supplementary Fig 7b, c and d. (b) Histograms of IKAROS expression in CD4 T cell subsets of a representative RA patient (top) and a HC (bottom, red). IKAROS expression in CD4 T cell subsets is bimodal with a high and low/negative subpopulation. (c) Frequencies of the IKAROS<sup>high</sup> population in CD4 subsets from 8 HC and 7 RA patients. (d) IKAROS MFI in the IKAROS<sup>high</sup> population. Data were analyzed by unpaired two-tailed student's *t* test presented as mean± SEM (c, d). Source data are provided as a Source Data file.

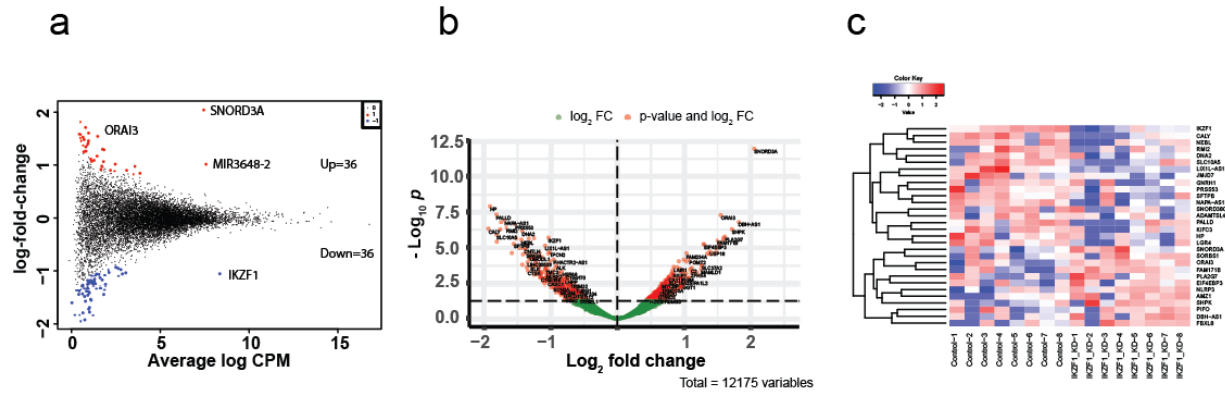

**Supplementary Figure 8. Influence of reduced *IKAROS* expression on the transcriptome.**

(a) Purified naïve CD4 T cells from 8 HC were transfected with control or *IKAROS* siRNA and subjected to RNA-seq. Data were analyzed using a negative binomial generalized linear model after conditional quantile normalization. Scatter plot (MA-plot) of  $\text{log}_2$  fold differences between control and *IKAROS*-silenced cells versus the mean of normalized counts. (b) Volcano plot with the top 100 differentially expressed transcripts indicated. (c) Heat plot showing the log CPM z-scores of the top 30 differentially expressed genes.



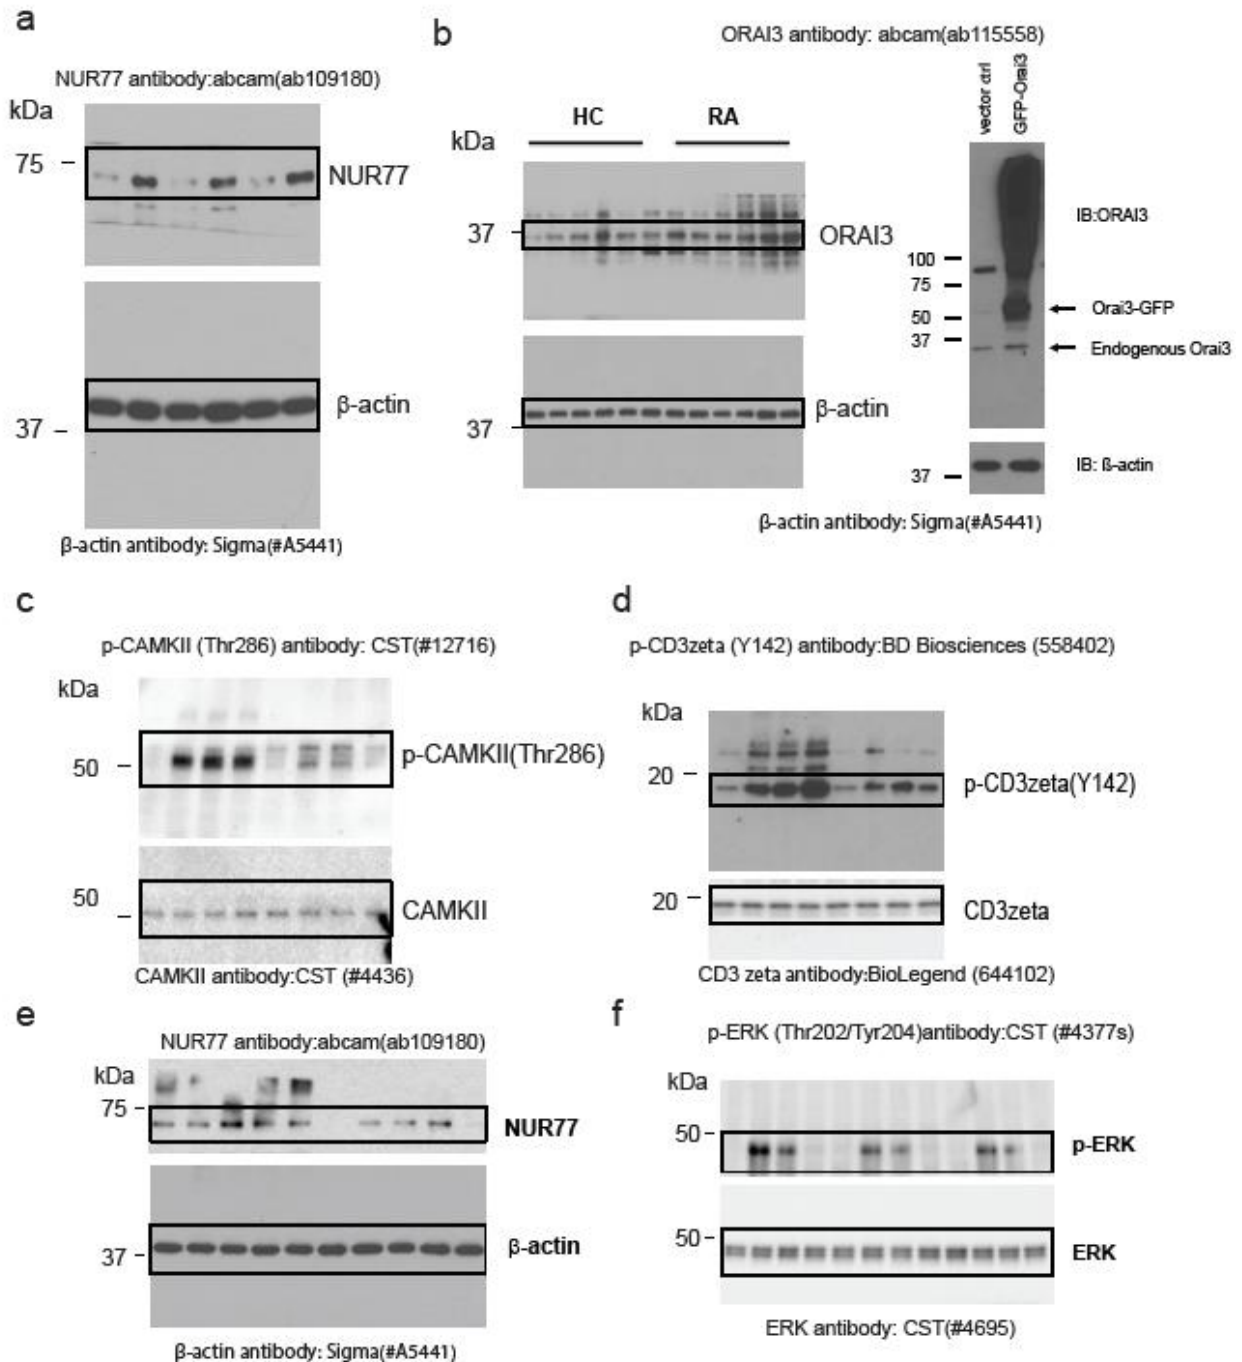

**Supplementary Figure 9. Original immunoblots corresponding to Fig. 1e (a); Fig. 2f (b left); Fig. 3b, c & d (c-e), and Fig. 4b (f). Supplementary Figure 2b includes a Western blot of Jurkat cells transfected with control or PCMV- GFP-ORAI3 plasmid to confirm specificity of the ORAI3-specific antibody (right).**

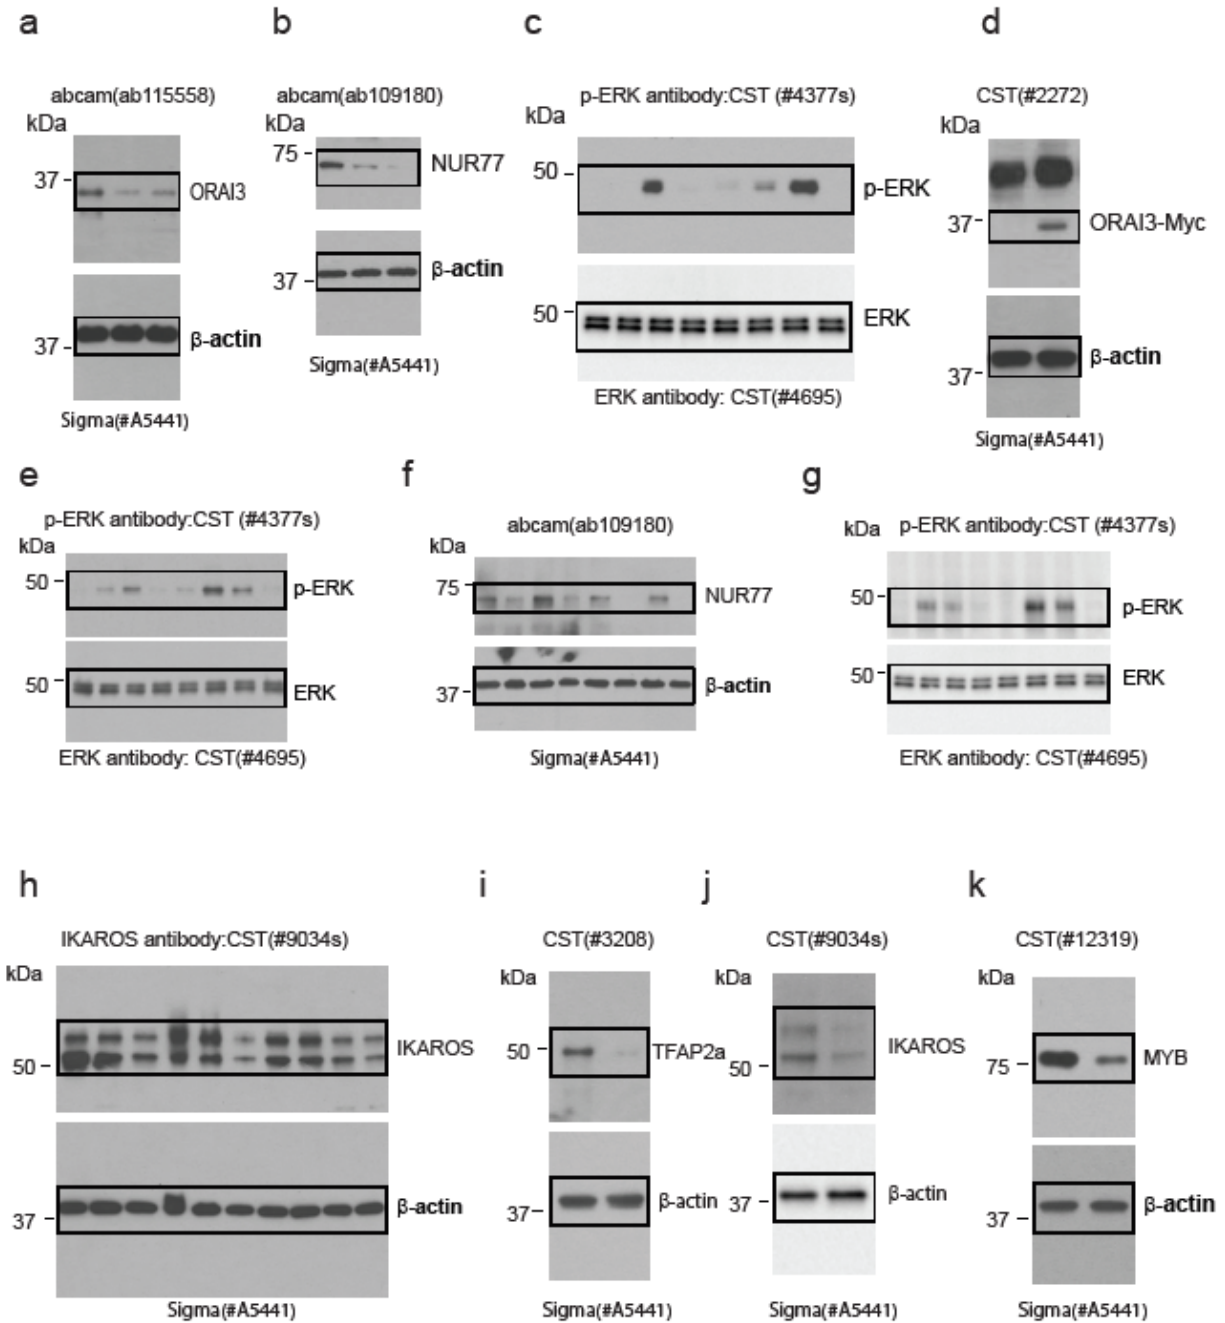

**Supplementary Figure 10. Original immunoblot corresponding to Fig. 4c, d, f, g (a-d); Fig. 5b, f (e-f); Fig. 7g (g); Fig. 8c (h); supplementary Figure 6a, b, c (i-k).**

**Supplementary Table 1.**

## Demographic and Clinical Characteristics of the Patient Populations

|                                           | <b>Rheumatoid arthritis<br/>(RA)</b> | <b>Psoriatic Arthritis<br/>(PsA)</b> |
|-------------------------------------------|--------------------------------------|--------------------------------------|
| <b>Demographic parameters</b>             |                                      |                                      |
| No. of subjects                           | 97                                   | 15                                   |
| Sex (F/M)                                 | 19/78                                | 0/15                                 |
| Age (mean $\pm$ SEM [years])              | 64.27 $\pm$ 1.13                     | 61.2 $\pm$ 2.67                      |
| <b>Clinical parameters</b>                |                                      |                                      |
| Disease duration (mean $\pm$ SEM [years]) | 14.57 $\pm$ 1.42                     | 11.00 $\pm$ 2.34                     |
| CDAI (mean $\pm$ SEM)                     | 14.48 $\pm$ 1.47                     | 17.6 $\pm$ 2.61                      |
| <2.8 (%)                                  | 18                                   | 0                                    |
| 2.8 - 10 (%)                              | 26                                   | 20                                   |
| 10 – 22 (%)                               | 34                                   | 60                                   |
| >22 (%)                                   | 17                                   | 20                                   |
| No DMARD (%)                              | 7                                    | 7                                    |
| Medications (%)                           |                                      |                                      |
| Corticosteroids                           | 22                                   | 7                                    |
| Methotrexate                              | 43                                   | 40                                   |
| Hydroxychloroquine                        | 45                                   | 20                                   |
| TNF $\alpha$ inhibitor                    | 33                                   | 60                                   |
| Other DMARDs                              | 23                                   | 7                                    |

**Supplementary Table 2. List of primers**

| <b>Oligo name</b> | <b>Forward (5' – 3')</b> | <b>Reverse (5' – 3')</b> |
|-------------------|--------------------------|--------------------------|
| <i>ITPR1</i>      | TTTCCAGAACTGCTTTTGGG     | AACCGGGGACCTTAACAATC     |
| <i>ITPR2</i>      | CTTGTTTGGCTTGCTTTGCT     | CAACCCTCCCAAGAAGTTCA     |
| <i>ITPR3</i>      | GAGGCAGTCACGGAATTCT      | GTCATGGCTTCATCAGCAC      |
| <i>RYR1</i>       | AACTGCTTCTGGCTGTCCAT     | ACTCAAGGACATTGTGGGCT     |
| <i>RYR2</i>       | CCGGAACAGTATGAAGACCAGCTA | CACACAACGCTGGCAATTCAC    |
| <i>ORAI1</i>      | GGTAGTCGTGGTCAGCGTC      | CAAGCTTAAAGCCTCCAGCC     |
| <i>ORAI2</i>      | ACTGGTACTGCGTCTCCAGC     | CTACCTGAGCAGGGCCAA       |
| <i>ORAI3</i>      | GGTGGTACTCGTGGTCACT      | GGCCAAGCTCAAAGCTTCC      |
| <i>STIM1</i>      | ACACAGGGGCTTGTCAATTC     | GTCACAGTGAGAAGGCGACA     |
| <i>STIM2</i>      | GCATGGTGGACTCAGTGACA     | ACTGGCTCTGCCGCAACT       |
| <i>TRB</i>        | CCTTCAACAACAGCATTATTCCAG | CGAGGGAGCACAGGCTGTCTT    |
| <i>TNF</i>        | AGATGATCTGACTGCCTGGG     | CTGCTGCACTTTGGAGTGAT     |
| <i>TNFSF11</i>    | GGTGGATGGCTCATGGTTAGA    | CATGTTGGAGATCTTGGCCC     |
| <i>IL6</i>        | CTTCGGTCCAGTTGCCTTCT     | GTGCCTCTTTGCTGCTTCA      |
| <i>IL1B</i>       | ATCCAGCTACGAATCTCCGA     | CCACTTGTTGCTCCATATCC     |
| <i>TBX21</i>      | CGGATGTTCCATTCTGTC       | TTCCACACTGCACCCACTTG     |
| <i>IFNG</i>       | ACTAGGCAGCCAACCTAAGCAAGA | CATCAGGGTCACCTGACACATTCA |
| <i>RORC</i>       | TGCCAGAATGACCAGATTGTG    | ATGCCACCGTATTTGCCTTC     |
| <i>IL17</i>       | CAGGATGCCCAAATTCTGAGG    | CAAGGTGAGGTGGATCGGTT     |
| <i>FOXP3</i>      | CAGCCATGATCAGCCTCACA     | CACTGGGATTTGGGAAGGTG     |
| <i>GATA3</i>      | AGGAAGGCATCCAGACCAGA     | CCGGGTAAACGAGCTGTTCT     |
| <i>ACTB</i>       | GCACAGAGCCTCGCCTT        | GTTGTGACGACGAGCG         |
